# Supplementary material for: Prognostic value of preoperative hematological markers combined with molecular pathology in patients with diffuse gliomas
Source: Aging (Albany NY). 2019 Aug 23;11(16):6252–72. doi: 10.18632/aging.102186 (PMC6738441; doi:10.18632/aging.102186)
Supplement: Supplementary Figures [file aging-11-102186-s003.pdf]

## SUPPLEMENTARY FIGURES

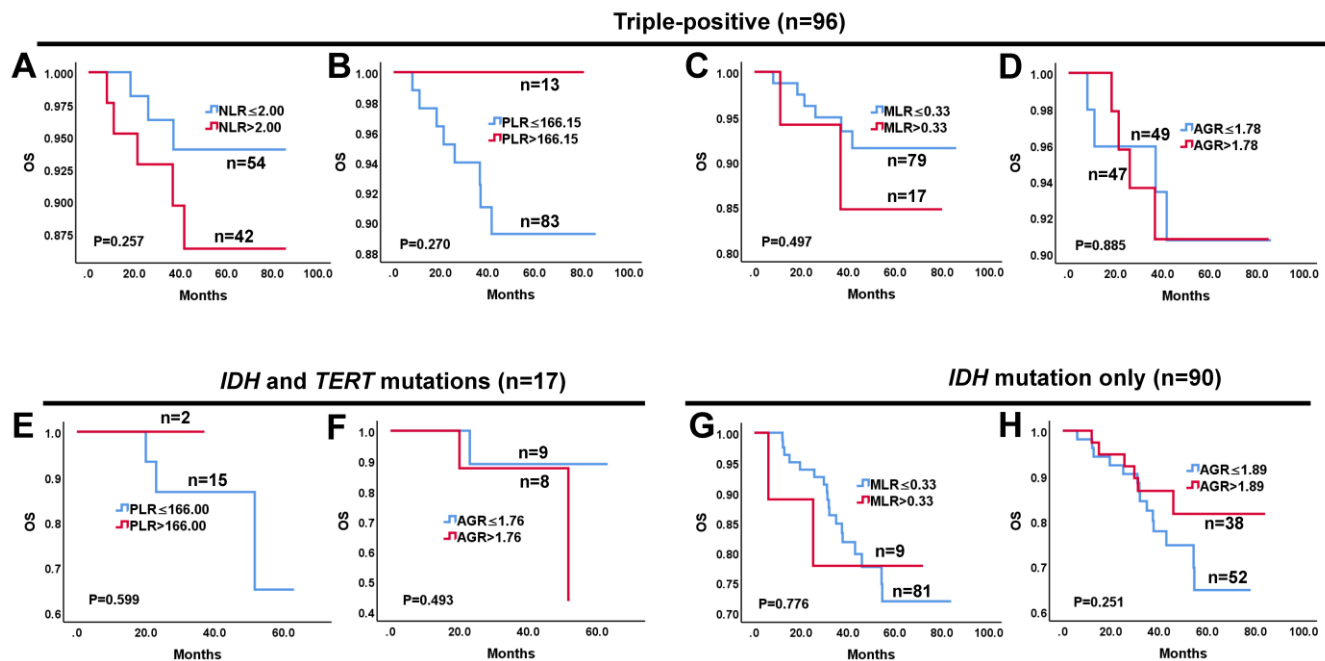

**Supplementary Figure 1. Kaplan-Meier overall survival curves of subgroups divided by hematological markers in triple-positive, IDH and TERT mutations, and IDH mutation only molecular groups of lower-grade gliomas. (A–D)** In triple-positive group of lower-grade gliomas, the OS of patients with NLR $>2.00$  or PLR $>166.15$  or MLR $>0.33$  or AGR $>1.78$  does not significantly differ from that of patients with NLR $\leq 2.00$  or MLR $\leq 0.29$  or MLR $\leq 0.33$  or AGR $\leq 1.78$  (NLR P=0.257, PLR P=0.270, MLR P=0.497, AGR P=0.885). **(E, F)** In IDH and TERT mutations group of lower-grade gliomas, the OS of patients with PLR $>166.00$  or AGR $>1.76$  does not significantly differ from that of patients with PLR $\leq 166.00$  or AGR $\leq 1.76$  (PLR P=0.599, AGR P=0.493). **(G, H)** In IDH mutation only group of lower-grade gliomas, the OS of patients with MLR $>0.33$  or AGR $>1.89$  does not significantly differ from that of patients with MLR $\leq 0.33$  or AGR $\leq 1.89$  (MLR P=0.776, AGR P=0.251).

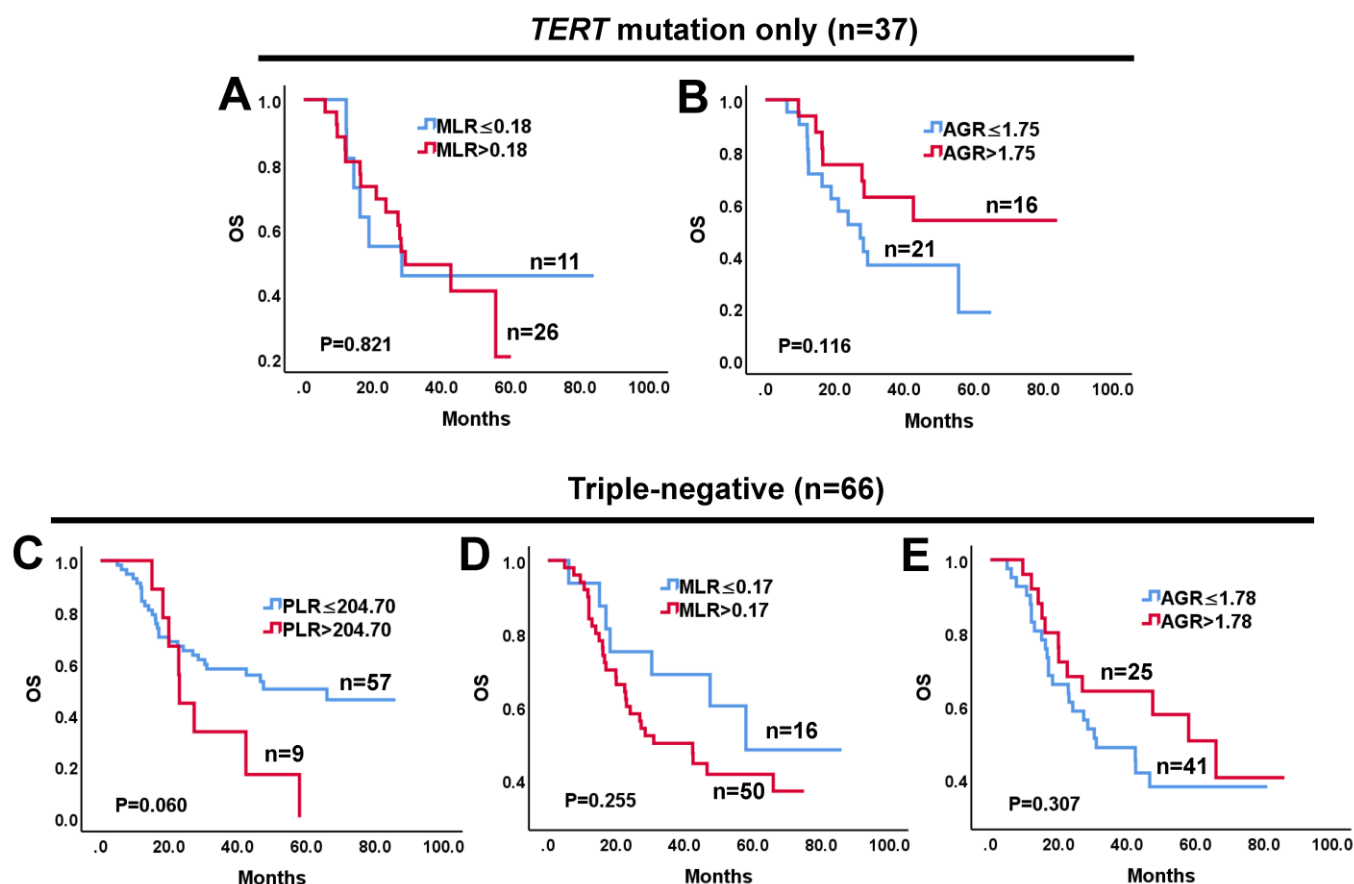

**Supplementary Figure 2. Kaplan-Meier overall survival curves of subgroups divided by hematological markers in *TERT* mutation only, and triple-negative groups of lower-grade gliomas.** (A–B) In *TERT* mutation only group of lower-grade gliomas, the OS of patients with MLR $>0.18$  or AGR $>1.75$  does not significantly differ from that of patients with MLR $\leq 0.18$  or AGR $\leq 1.75$  (MLR P=0.821, AGR P=0.116). (C–E) In triple-negative group of lower-grade gliomas, the OS of patients with PLR $>204.70$  or MLR $>0.17$  or AGR $>1.78$  does not significantly differ from that of patients with PLR $\leq 204.70$  or MLR $\leq 0.17$  or AGR $\leq 1.78$  (PLR P=0.060, MLR P=0.255, AGR P=0.307).
