# Supplementary material for: Prognostic value of preoperative hematological markers combined with molecular pathology in patients with diffuse gliomas
Source: Aging (Albany NY). 2019 Aug 23;11(16):6252–72. doi: 10.18632/aging.102186 (PMC6738441; doi:10.18632/aging.102186)
Supplement: Supplementary Tables [file aging-11-102186-s002.pdf]

## SUPPLEMENTARY TABLES

**Supplementary Table 1. Clinico-pathological features of the cohort (n=592).**

| Baseline characteristics | Number            |
|--------------------------|-------------------|
| Gender                   |                   |
| Male                     | 335 (56.59%)      |
| Female                   | 257 (43.41%)      |
| Age                      |                   |
| Mean $\pm$ SD            | 48.26 $\pm$ 1.503 |
| Median (range)           | 42 (16-82)        |
| Extent of resection      |                   |
| Complete                 | 456 (77.03%)      |
| Incomplete               | 136 (22.97%)      |
| RT                       |                   |
| Yes                      | 459 (77.53%)      |
| No                       | 133 (22.47%)      |
| CHT                      |                   |
| TMZ                      | 186 (31.42%)      |
| NMST/FMST                | 156 (26.35%)      |
| No                       | 250 (42.23%)      |
| Tumor grade              |                   |
| II                       | 282 (47.64%)      |
| III                      | 122 (20.61%)      |
| IV                       | 188 (31.76%)      |
| IDH mutations            |                   |
| IDH1 mutation            | 235 (41.01%)      |
| R132C                    | 2 (0.35%)         |
| R132G                    | 1 (0.17%)         |
| R132H                    | 227 (39.62%)      |
| R132S                    | 2 (0.35%)         |
| R133H                    | 1 (0.17%)         |
| R134H                    | 1 (0.17%)         |
| R135H                    | 1 (0.17%)         |
| IDH2 mutation            | 11 (1.92%)        |
| R132S                    | 1 (0.17%)         |
| R172G                    | 1 (0.17%)         |
| R172K                    | 5 (0.87%)         |
| R172W                    | 4 (0.70%)         |
| IDH wild type            | 327 (57.07%)      |
| TERT promoter mutations  |                   |

|                                           |              |
|-------------------------------------------|--------------|
| TERT promoter mutation                    | 286 (49.91%) |
| C228T                                     | 212 (37.00%) |
| C250T                                     | 74 (12.91%)  |
| TERT promoter wild type                   | 287 (50.09%) |
| 1p/19q deletion                           |              |
| Only 1p deletion                          | 15 (2.62%)   |
| Only 19q deletion                         | 35 (6.11%)   |
| 1p/19q codeletion                         | 139 (24.26%) |
| 1p/19q intact                             | 384 (67.02%) |
| Hematological marker (n=528) <sup>a</sup> |              |
| NLR (Mean ±SD)                            | 3.02±2.81    |
| PLR (Mean ±SD)                            | 129.28±62.17 |
| MLR (Mean ±SD)                            | 0.28±0.13    |
| AGR (Mean ±SD)                            | 1.77±0.36    |
| MPV (Mean ±SD)                            | 8.46±0.05    |
| PDW (Mean ±SD)                            | 16.47±0.02   |
| Molecular group                           |              |
| Grade II-IV (n=573) <sup>b</sup>          |              |
| Triple-positive                           | 103 (17.98%) |
| <i>IDH</i> and <i>TERT</i> mutations      | 19 (3.32%)   |
| <i>IDH</i> mutation only                  | 108 (18.85%) |
| <i>TERT</i> mutation only                 | 155 (27.05%) |
| Triple-negative                           | 144 (25.13%) |
| Other                                     | 44 (7.7%)    |
| Lower-grade gliomas (n=392)               |              |
| Triple-positive                           | 103 (26.28%) |
| <i>IDH</i> and <i>TERT</i> mutations      | 19 (4.85%)   |
| <i>IDH</i> mutation only                  | 100 (25.51%) |
| <i>TERT</i> mutation only                 | 48 (12.24%)  |
| Triple-negative                           | 78 (19.90%)  |
| Other                                     | 44 (11.22%)  |
| Grade IV glioma (n=181)                   |              |
| <i>IDH</i> mutation only                  | 8 (4.42%)    |
| <i>TERT</i> mutation only                 | 107 (59.12%) |
| Triple-negative                           | 66 (36.46%)  |

<sup>a</sup>64 cases were excluded from the 592 cases due to conditions that could influence hematological makers

<sup>b</sup>19 cases were excluded from the 592 cases due to unavailability of FFPE tissues of the tumors.

RT: radiation therapy, indicating postoperative radiation therapy after first operation

CHT: chemotherapy, indicating postoperative chemotherapy after first operation

TMZ: temozolomide, FMST: fotemustine, NMST: nimustine

**Supplementary Table 2. Univariate analysis of prognostic factors for OS in lower-grade gliomas (n=404).**

| Factors                                | No. of cases | 5-year OS (%) | P-value           |
|----------------------------------------|--------------|---------------|-------------------|
| Sex                                    |              |               |                   |
| Male                                   | 228          | 59.6          | P=0.276           |
| Female                                 | 176          | 66.8          |                   |
| Age                                    |              |               |                   |
| ≤40                                    | 146          | 73.7          | <b>P&lt;0.001</b> |
| >40                                    | 258          | 56.1          |                   |
| KPS                                    |              |               |                   |
| ≤80                                    | 149          | 56.7          | <b>P=0.019</b>    |
| >80                                    | 255          | 66.7          |                   |
| Extent of resection                    |              |               |                   |
| Gross total                            | 326          | 65.2          | <b>P=0.004</b>    |
| Subtotal                               | 78           | 49.9          |                   |
| RT                                     |              |               |                   |
| Yes                                    | 324          | 65.9          | <b>P=0.019</b>    |
| No                                     | 80           | 48.1          |                   |
| CHT                                    |              |               |                   |
| Yes                                    | 313          | 64.7          | P=0.129           |
| No                                     | 91           | 54.4          |                   |
| Grade                                  |              |               |                   |
| II                                     | 282          | 76.3          | <b>P&lt;0.001</b> |
| III                                    | 122          | 27.8          |                   |
| Molecular group(n=348) <sup>a, b</sup> |              |               |                   |
| Triple-positive                        | 103          | 90.2          | <b>P&lt;0.001</b> |
| <i>IDH</i> and <i>TERT</i> mutations   | 19           | 67.4          |                   |
| <i>IDH</i> mutation only               | 100          | 70.0          |                   |
| <i>TERT</i> mutation only              | 48           | 24.0          |                   |
| Triple-negative                        | 78           | 38.3          |                   |

<sup>a</sup> 12 cases were excluded due to unavailability of FFPE tissues of the tumors, and 44 cases of other combinations of the three molecular markers were excluded.

<sup>b</sup> multiple comparisons for molecular groups are listed in Supplementary Table 3

OS: overall survival; KPS: Karnofsky Performance Status; RT: radiation therapy, indicating postoperative radiation therapy after first operation; CHT: chemotherapy, indicating postoperative chemotherapy after first operation

**Supplementary Table 3. The classification of radiotherapy, chemotherapy and chemotherapy program in WHO II-III gliomas (n=403).**

|               | Astrocytoma (%) | Oligodendroglioma or Oligoastrocytomas (%) |
|---------------|-----------------|--------------------------------------------|
| Only RT       | 14 (9.03)       | 31 (12.5)                                  |
| Only CHT      | 10 (6.45)       | 24 (9.68)                                  |
| RT and CHT    | 113 (72.90)     | 166 (66.94)                                |
| No RT nor CHT | 18 (11.61)      | 27 (10.89)                                 |
| CHT program   |                 |                                            |
| TMZ           | 36 (29.27)      | 68 (35.79)                                 |
| FMST/NMST     | 49 (39.84)      | 81 (42.63)                                 |
| NA            | 38 (30.89)      | 41 (21.58)                                 |

RT: radiotherapy; CHT: chemotherapy; TMZ: temozolomide; FMST: fotemustine; NMST: nimustine; NA: not available

**Supplementary Table 4. Univariate analysis of molecular groups of lower-grade gliomas with multiple comparisons (n=348<sup>a</sup>).**

| Molecular group 1 vs Molecular group 2                            | No. of cases | 5-year OS (%) | P-value <sup>b</sup> |
|-------------------------------------------------------------------|--------------|---------------|----------------------|
| Triple-positive vs <i>IDH</i> and <i>TERT</i> mutations           | 103 vs 19    | 90.2 vs 67.4  | P=0.096              |
| Triple-positive vs <i>IDH</i> mutation only                       | 103 vs 100   | 90.2 vs 70.0  | P=0.009              |
| Triple-positive vs <i>TERT</i> mutation only                      | 103 vs 48    | 90.2 vs 24.0  | <b>P&lt;0.001</b>    |
| Triple-positive vs Triple negative                                | 103 vs 78    | 90.2 vs 38.3  | <b>P&lt;0.001</b>    |
| <i>IDH</i> and <i>TERT</i> mutations vs <i>IDH</i> mutation only  | 19 vs 100    | 67.4 vs 70.1  | P=0.994              |
| <i>IDH</i> and <i>TERT</i> mutations vs <i>TERT</i> mutation only | 19 vs 48     | 67.4 vs 24.0  | <b>P=0.002</b>       |
| <i>IDH</i> and <i>TERT</i> mutations vs Triple negative           | 19 vs 78     | 67.4 vs 38.3  | P=0.011              |
| <i>IDH</i> mutation only vs <i>TERT</i> mutation only             | 100 vs 48    | 70.0 vs 24.0  | <b>P&lt;0.001</b>    |
| <i>IDH</i> mutation only vs Triple negative                       | 100 vs 78    | 70.0 vs 38.3  | <b>P&lt;0.001</b>    |
| <i>TERT</i> mutation only vs Triple negative                      | 48 vs 78     | 24.0 vs 38.3  | P=0.162              |

<sup>a</sup>12 cases were excluded due to unavailability of FFPE tissues of the tumors, and 44 cases of other combinations of the three molecular markers were excluded.

<sup>b</sup>To correct for multiple comparisons, a Bonferroni adjusted P value of 0.05/10(number of times of comparisons) =0.005 was adopted as the significance threshold

**Supplementary Table 5. Univariate analysis of prognostic factors for OS in Grade IV glioma (n=188).**

| Factors                              | No. of cases | 5-year OS (%) | P-value           |
|--------------------------------------|--------------|---------------|-------------------|
| Sex                                  |              |               |                   |
| Male                                 | 107          | 4.8           | P=0.488           |
| Female                               | 81           | 2.2           |                   |
| Age                                  |              |               |                   |
| ≤62                                  | 50           | 3.5           | <b>P=0.037</b>    |
| >62                                  | 138          | 4.0           |                   |
| KPS                                  |              |               |                   |
| ≤80                                  | 45           | 9.7           | P=0.151           |
| >80                                  | 143          | 2.6           |                   |
| Extent of resection                  |              |               |                   |
| Gross total                          | 130          | 4.4           | <b>P&lt;0.001</b> |
| Subtotal                             | 58           | 1.9           |                   |
| RT                                   |              |               |                   |
| Yes                                  | 135          | 6.6           | <b>P=0.006</b>    |
| No                                   | 53           | 6.3           |                   |
| CHT                                  |              |               |                   |
| Yes                                  | 125          | 0.0           | <b>P&lt;0.001</b> |
| No                                   | 63           | 3.2           |                   |
| Molecular group (n=181) <sup>a</sup> |              |               |                   |
| <i>IDH</i> mutation only             | 8            | 25.0          | P=0.285           |
| <i>TERT</i> mutation only            | 107          | 2.7           |                   |
| Triple-negative                      | 66           | 3.7           |                   |

<sup>a</sup>7 cases were excluded due to unavailability of FFPE tissues of the tumors.

OS: overall survival; KPS: Karnofsky Performance Status; RT: radiation therapy, indicating postoperative radiation therapy after first operation CHT: chemotherapy, indicating postoperative chemotherapy after first operation

**Supplementary Table 6. P-value in the univariate analysis of subgroups of lower-grade gliomas with multiple comparisons (n=348<sup>a</sup>).**

| <b>Subgroup 1 vs Subgroup 2</b>                              | <b>P-value<sup>b</sup></b> |
|--------------------------------------------------------------|----------------------------|
| Triple positive vs IDH and TERT mutation-Low NLR             | <b>P&lt;0.001</b>          |
| Triple positive vs IDH mutation only-Low NLR                 | <b>P&lt;0.001</b>          |
| Triple positive vs TERT mutation only-High NLR               | <b>P&lt;0.001</b>          |
| Triple positive vs TERT mutation only-Low NLR                | <b>P&lt;0.001</b>          |
| Triple positive vs Triple-negative-Low NLR                   | <b>P&lt;0.001</b>          |
| IDH and TERT mutation-High NLR vs TERT mutation only-Low NLR | <b>P&lt;0.001</b>          |
| IDH and TERT mutation-High NLR vs Triple-negative-Low NLR    | <b>P=0.001</b>             |
| IDH and TERT mutation-Low NLR vs Triple-negative-Low NLR     | <b>P&lt;0.001</b>          |
| IDH mutation only-High NLR vs TERT mutation only-High NLR    | <b>P&lt;0.001</b>          |
| IDH mutation only-High NLR vs TERT mutation only-Low NLR     | <b>P&lt;0.001</b>          |
| IDH mutation only-High NLR vs Triple-negative-Low NLR        | <b>P&lt;0.001</b>          |
| IDH mutation only-Low NLR vs TERT mutation only-Low NLR      | <b>P&lt;0.001</b>          |
| IDH mutation only-Low NLR vs Triple-negative-Low NLR         | <b>P=0.001</b>             |
| TERT mutation only-High NLR vs TERT mutation only-Low NLR    | <b>P&lt;0.001</b>          |
| TERT mutation only-Low NLR vs Triple-negative-High NLR       | <b>P&lt;0.001</b>          |
| TERT mutation only-Low NLR vs Triple-negative-Low NLR        | <b>P&lt;0.001</b>          |
| Triple-negative-High NLR vs Triple-negative-Low NLR          | <b>P=0.001</b>             |

<sup>a</sup>12 cases were excluded due to unavailability of FFPE tissues of the tumors, and 44 cases of other combinations of the three molecular markers were excluded.

<sup>b</sup>To correct for multiple comparisons, a Bonferroni adjusted P value of 0.05/36(number of times of comparisons) =0.0014 was adopted as the significance threshold

We removed the date that P>0.05 for a more streamlined form.

**Supplementary Table 7. Univariate analysis of risk group of lower-grade gliomas with multiple comparisons (n=348<sup>a</sup>).**

| <b>Risk group 1 vs Risk group 2</b> | <b>No.of cases</b> | <b>5-year OS (%)</b> | <b>P-value<sup>b</sup></b> |
|-------------------------------------|--------------------|----------------------|----------------------------|
| Low risk vs Intermediate-I          | 179 vs 98          | 85.5 vs 53.0         | <b>P&lt;0.001</b>          |
| Low risk vs High risk               | 179 vs 18          | 85.5 vs 0.0          | <b>P&lt;0.001</b>          |
| Low risk vs Intermediate-II         | 179 vs 53          | 85.5 vs 23.4         | <b>P&lt;0.001</b>          |
| Intermediate-I vs High risk         | 98 vs 18           | 53.0 vs 0.0          | <b>P&lt;0.001</b>          |
| Intermediate-I vs Intermediate-II   | 98 vs 53           | 53.0 vs 23.4         | <b>P&lt;0.001</b>          |
| High risk vs Intermediate-II        | 18 vs 53           | 0.0 vs 23.4          | <b>P&lt;0.001</b>          |

<sup>a</sup>12 cases were excluded due to unavailability of FFPE tissues of the tumors, and 44 cases of other combinations of the three molecular markers were excluded.

<sup>b</sup>To correct for multiple comparisons, a Bonferroni adjusted P value of 0.05/6(number of times of comparisons) =0.0083 was adopted as the significance threshold
